# Supplementary material for: One-pot synthesis of polyoxomolybdate anion intercalated layered double hydroxides and their application in ultra-deep desulfurization of fuels under mild conditions
Source: Royal Society of Chemistry journal article supplement (doi:10.1039/c8qi00248g), 2018-01-01
Supplement: c8qi00248g1.pdf [file c8qi00248g1.pdf]

## Electronic Supplementary Information

### One-Pot synthesis polyoxomolybdates anionic intercalated layered double hydroxides and their application in ultra-deep desulfurization of fuels at mild condition

Yu Guo,<sup>a</sup> Jiawei Fu,<sup>a</sup> Li Li,<sup>a</sup> Xiaonan Li,<sup>a</sup> Haiyu Wang,<sup>a</sup> Wenwen Ma<sup>\*b</sup> and Hong Zhang<sup>\*a</sup>

<sup>a</sup> Institute of Polyoxometalate Chemistry, Department of Chemistry, Northeast Normal University, Changchun, Jilin 130024, P. R. China

<sup>b</sup> College of chemistry and chemical engineering, College of chemistry and chemical engineering, Shenyang Normal University, Shenyang, Liaoning 110034, P.R. China.

Fax: +86-0431-85098827; Tel: +86-0431-85099372; E-mail: hope20130122@163.com, [zhangh@nenu.edu.cn](mailto:zhangh@nenu.edu.cn)

Single-crystal X-ray diffraction data for compounds using an Oxford Diffraction Gemini R Ultra diffractometer with graphite-monochromated Mo-K $\alpha$  radiation ( $\lambda = 0.71073 \text{ \AA}$ ) by using  $\omega$ -scan technique. The structure were solved and refined by full-matrix least squares on F2 using the SHELXL-2017 program.<sup>1</sup> Hydrogen atoms on C and N atoms using the theory of hydrogenation method and refined using the O-H distance restrained to a target value of  $0.85 \text{ \AA}$ . The entry of CCDC-1830449 contains the supplementary crystallographic data for the compounds. H atoms are omitted for clarity.

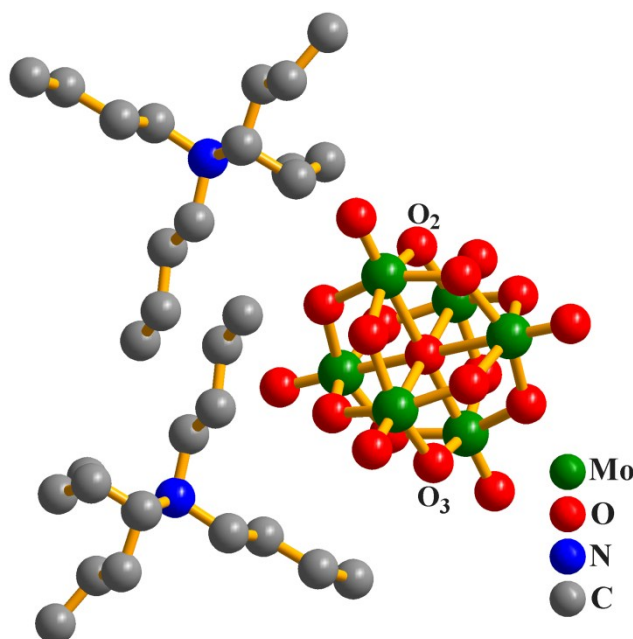

Fig.S1 The crystal structure of the  $[(n\text{-C}_4\text{H}_9)_4\text{N}]_2[\text{Mo}_6\text{O}_{19}]$ .

**Table.S1** The crystal bond length of the [(n-C<sub>4</sub>H<sub>9</sub>)<sub>4</sub>N]<sub>2</sub>[Mo<sub>6</sub>O<sub>19</sub>].

|             |           |
|-------------|-----------|
| Mo(1)-O(16) | 1.680(5)  |
| Mo(2)-O(15) | 1.679(4)  |
| Mo(3)-O(19) | 1.689(5)  |
| Mo(4)-O(8)  | 1.917(4)  |
| Mo(5)-O(17) | 1.924(5)  |
| Mo(6)-O(18) | 1.688(5)  |
| N(1)-C(16)  | 1.513(9)  |
| N(2)-C(43)  | 1.516(10) |

**Table.S2** The crystal bond angle of [(n-C<sub>4</sub>H<sub>9</sub>)<sub>4</sub>N]<sub>2</sub>[Mo<sub>6</sub>O<sub>19</sub>].

|                   |           |
|-------------------|-----------|
| O(16)-Mo(1)-O(6)  | 103.8(3)  |
| O(15)-Mo(2)-O(12) | 103.6(2)  |
| O(11)-Mo(3)-O(14) | 153.5(2)  |
| O(8)-Mo(4)-O(7)   | 87.5(2)   |
| O(17)-Mo(5)-O(6)  | 153.7(2)  |
| O(14)-Mo(6)-O(2)  | 76.38(16) |
| Mo(3)-O(2)-Mo(6)  | 90.44(13) |
| Mo(5)-O(2)-Mo(4)  | 89.57(12) |
| Mo(4)-O(1)-Mo(5)  | 116.0(2)  |
| C(5)-N(2)-C(10)   | 105.6(5)  |
| C(8)-C(5)-N(2)    | 116.2(6)  |

**Table.S3** The BET surface areas, pore volume and pore size of the Mg<sub>3</sub>Al-Mo<sub>6</sub> catalyst. <sup>a</sup> The atomic ratio of Mg and Al was determined by ICP measurement.

| Catalyst                           | Mg:Al <sup>a</sup> | S <sub>BET</sub> /m <sup>2</sup> g <sup>-1</sup> | Pore volume<br>(cm <sup>3</sup> g <sup>-1</sup> ) | Pore size/nm |
|------------------------------------|--------------------|--------------------------------------------------|---------------------------------------------------|--------------|
| Mg <sub>3</sub> Al-Mo <sub>6</sub> | 0.77:0.23          | 77.45                                            | 0.092                                             | 4.79         |

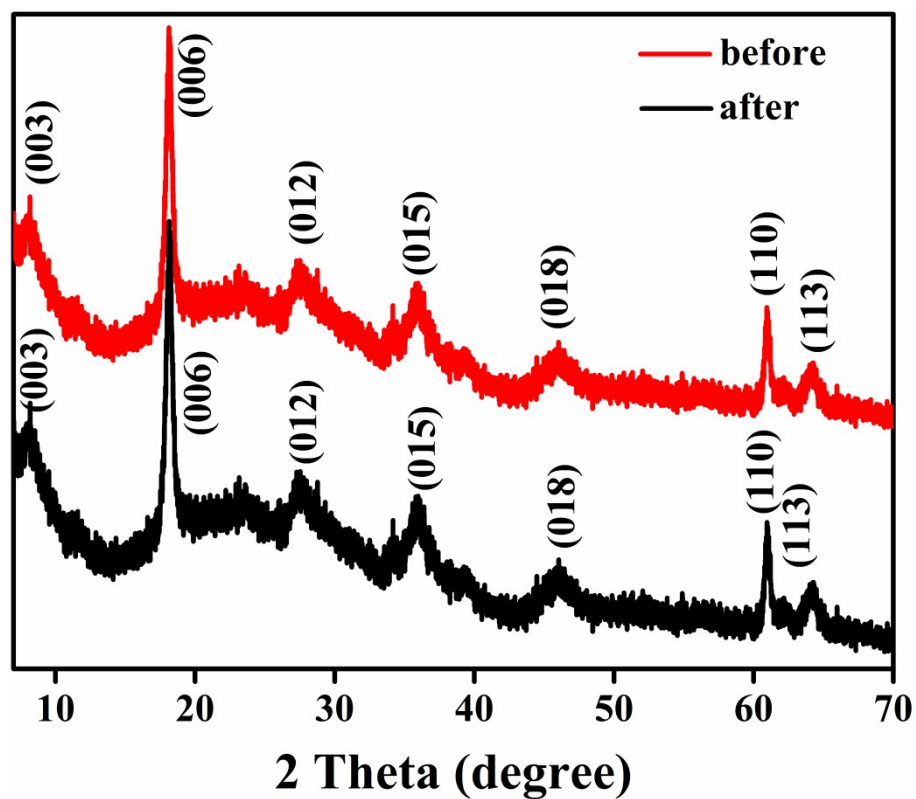

Fig.S2 XRD patterns of the recyclable  $Mg_3Al-MoO_6$  heterogeneous catalyst.

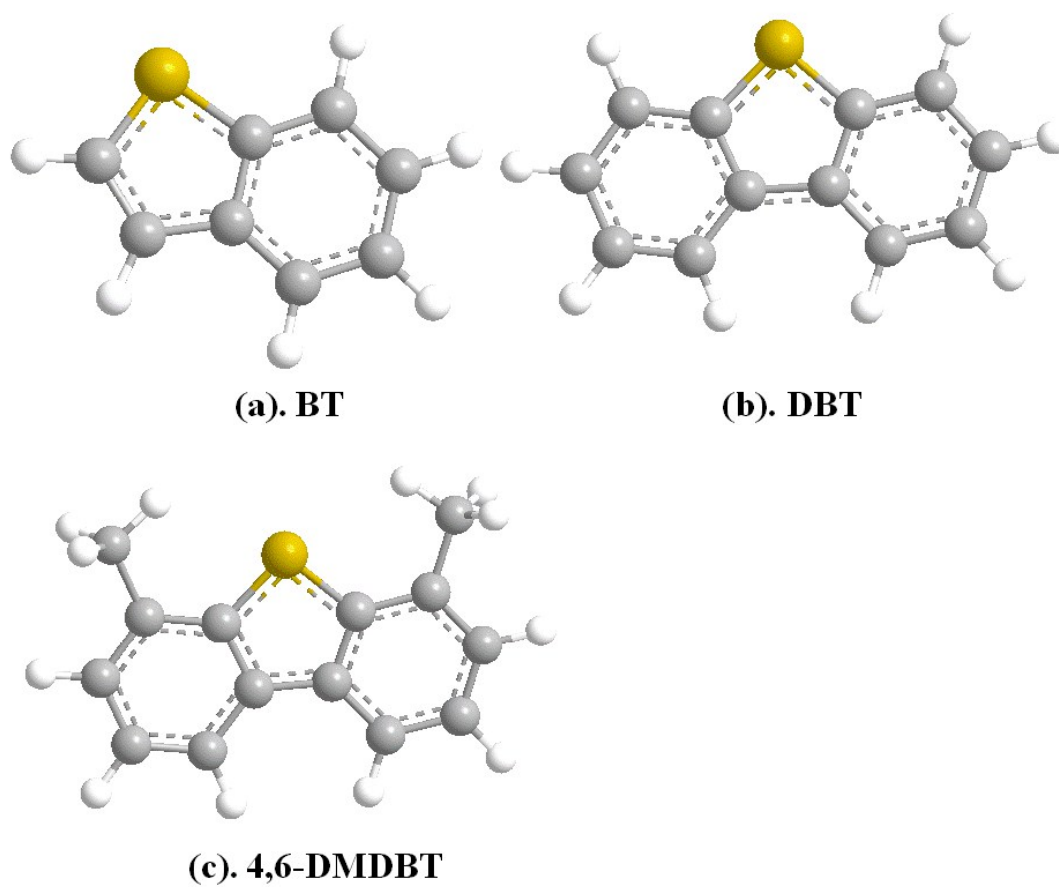

Fig.S3 Spatial structures of different sulfur-containing compounds. (a).BT, (b)DBT and (c)4,6-DMDBT.

**Table.S4** The removal of DBT in various ODS systems with different n(O/S)

| Catalyst                                                                              | n(O/S) | Sulfur removal %  |
|---------------------------------------------------------------------------------------|--------|-------------------|
| HPW-CeO <sub>2</sub>                                                                  | 6      | 96.1 <sup>2</sup> |
| HPW-TUD-1                                                                             | 8      | 98.1 <sup>3</sup> |
| Ti-MSM                                                                                | 10     | 99.8 <sup>4</sup> |
| Mg <sub>3</sub> Al-IL-EuW <sub>10</sub>                                               | 8      | 100 <sup>5</sup>  |
| FePcCl <sub>16</sub>                                                                  | 40     | 100 <sup>6</sup>  |
| Na <sub>7</sub> H <sub>2</sub> LnW <sub>10</sub> O <sub>36</sub> • 32H <sub>2</sub> O | 5      | 100 <sup>7</sup>  |

1. L. Peterson, J. Kelley, L. Peterson, M. D. Smith and H. C. Zur Loye, *J. Appl. Crystallography.*, 2009, **65 (4)**, 364-365.
2. M. Zhang, W. Zhu, S. Xun, H. Li, Q. Gu, Z. Zhao and Q. Wang, *Chem. Eng. J.*, 2013, **220 (6)**, 328-336.
3. L. Tang, G. Luo, M. Zhu, L. Kang, B. Dai, *J. Ind. Eng. Chem.*, 2013, **19 (2)**, 620-626.
4. A. T. Shah, B. Li, Z. E. Abdalla, *J. Colloid Interf. Sci.*, 2009, **336 (2)**, 707-711.
5. Y. Xu, W. Xuan, M. Zhang, H. N. Miras, Y. F. Song, *Dalton.T.*, 2016, **45 (48)**, 19511-19518.
6. H. Liu, S. Bao, Z. Cai, T. Xu, N. Li, L. Wang, H. Chen, W. Lu, W. Chen, *Chem. Eng. J.*, 2017, **317**, 1092-1098.
7. J. Xu, S. Zhao, W. Chen, M. Wang, Y. F. Song, *Chem.*, 2012, **18 (15)**, 4775-81.
